# Supplementary material for: Non-bonding interactions of anions with nitrogen heterocycles and phenyl rings: a critical Cambridge Structural Database analysis
Source: Royal Society of Chemistry journal article supplement (doi:10.1039/b311000a), 2003-01-01

## Supporting Information

### **Non Bonding Interactions of Anions with Nitrogen Heterocycles and Phenyl Rings: A Critical Cambridge Structural Database Analysis**

**Ritu Ahuja and Ashoka G. Samuelson\***

Department of Inorganic and Physical Chemistry, Indian Institute of Science,  
Bangalore-560012, India.

Fax: (+91) 080 360 1552; Tel: 080 293 2663; E-mail: [ashoka@ipc.iisc.ernet.in](mailto:ashoka@ipc.iisc.ernet.in)

**Fig. S1** Distribution of short contacts in phenyl rings.

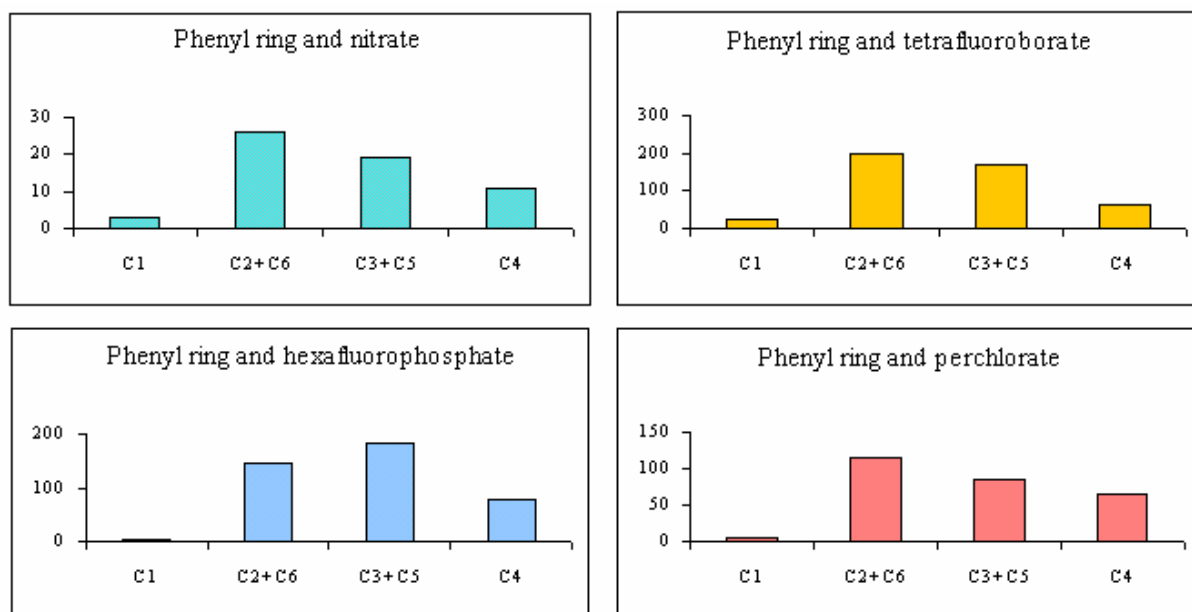

**Fig. S2** Distribution of number of structures with short C···Y contacts for various anions

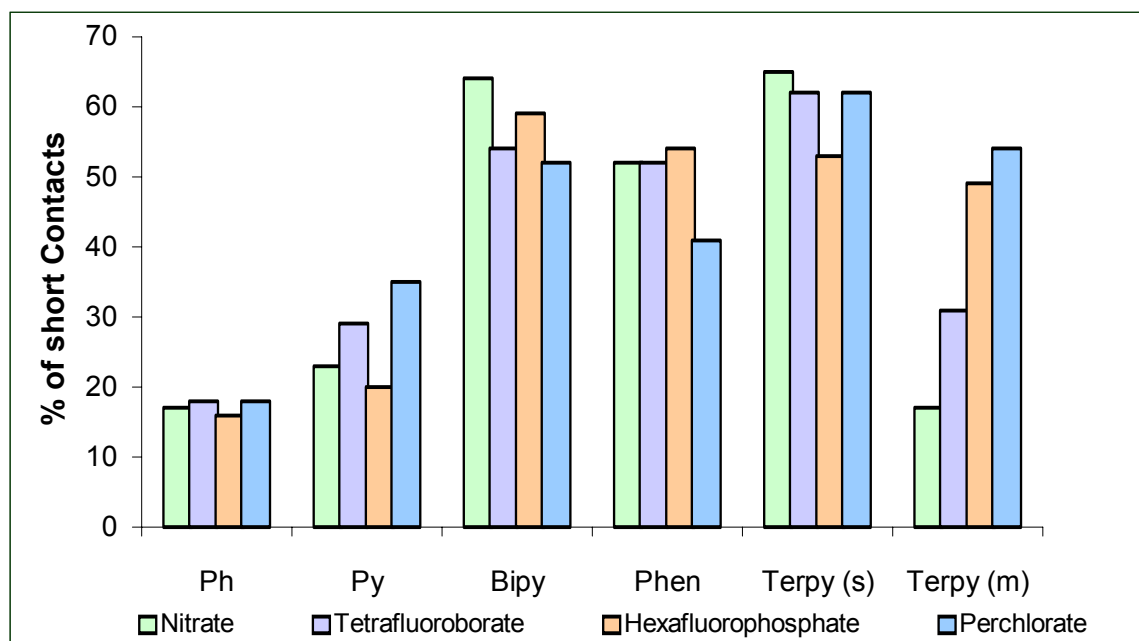

**Fig. S3** Distribution of  $\pi$ -interactions in different ring systems

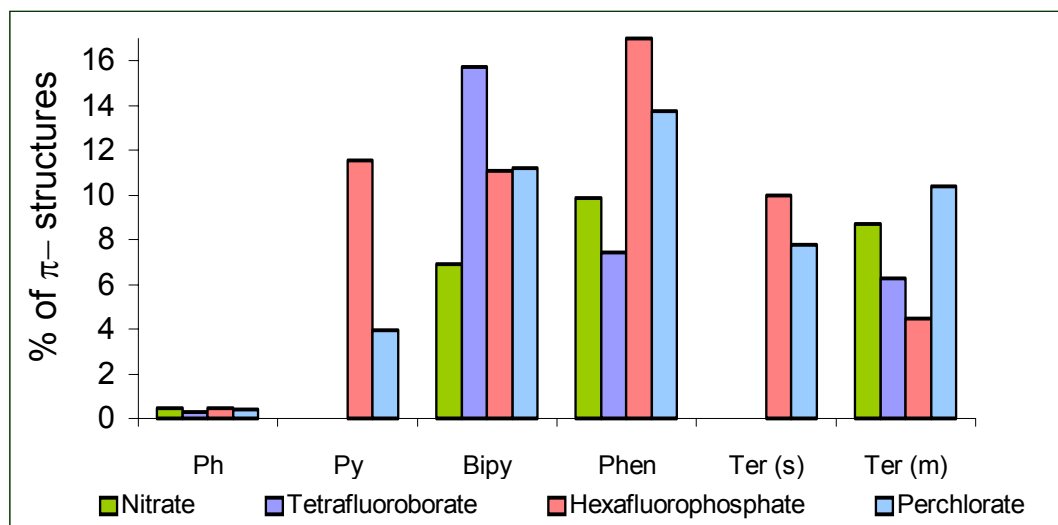

**Fig. S4** Examples of  $C\cdots Y$  interactions

(a)  $BF_4^-$  (JUBQIG)

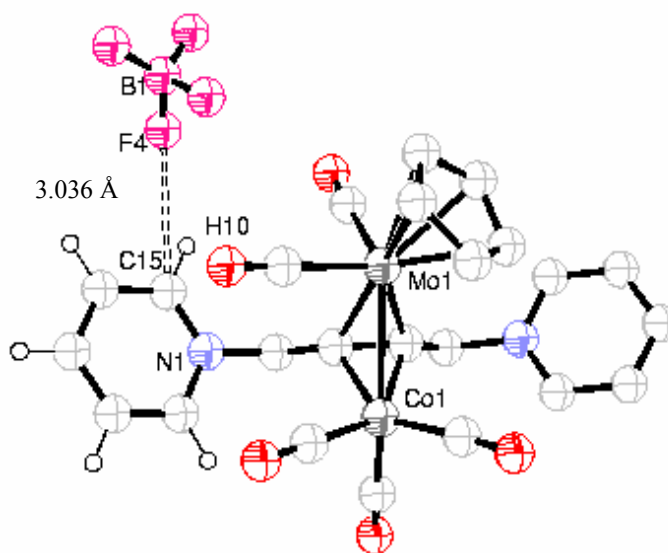

(b)  $\text{PF}_6^-$  (JEHSOE)

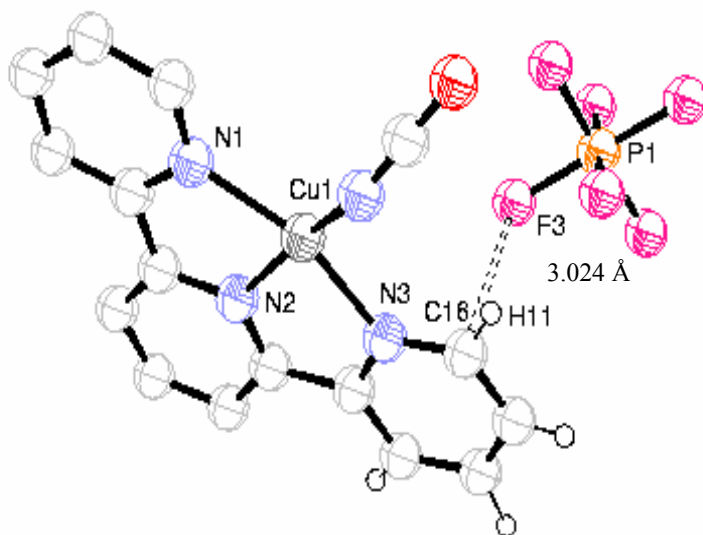

(c)  $\text{ClO}_4^-$  (CAZOCO)

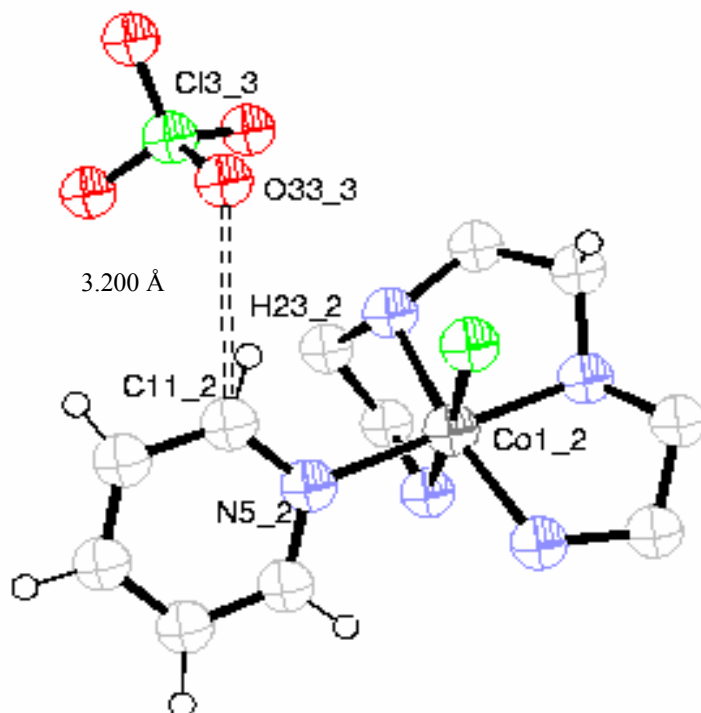

**Fig. S5** Examples of anion- $\pi$  interactions

(a)  $\text{NO}_3^-$  (CILVUO)

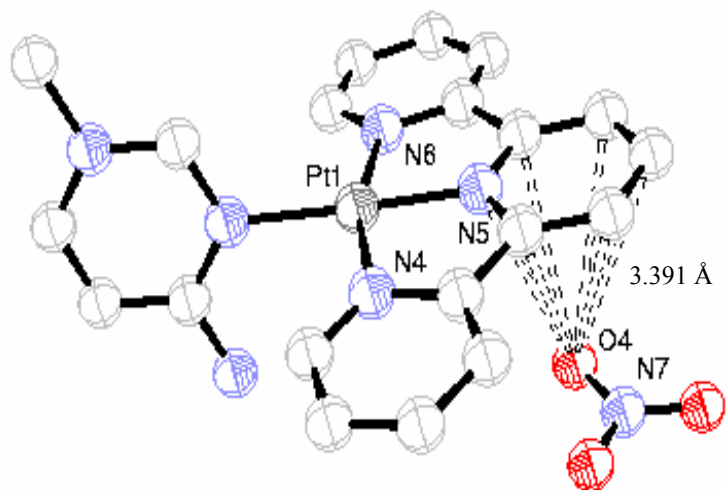

(b)  $\text{BF}_4^-$  (LONFID)

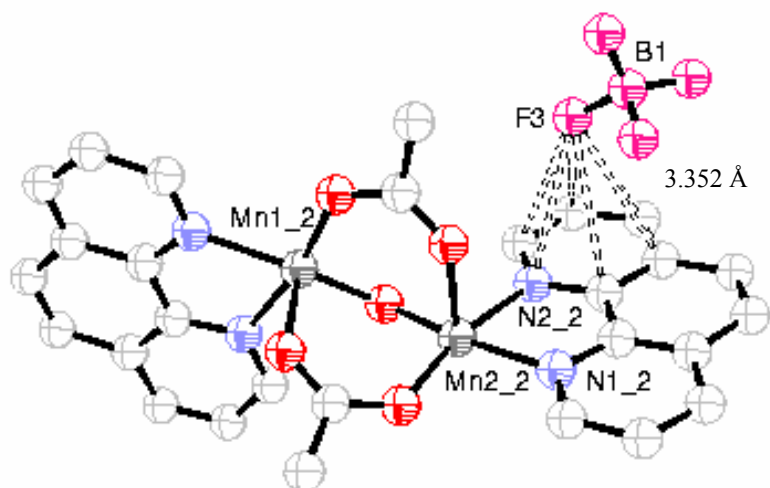

(c)  $\text{PF}_6^-$  (QEZCUT)

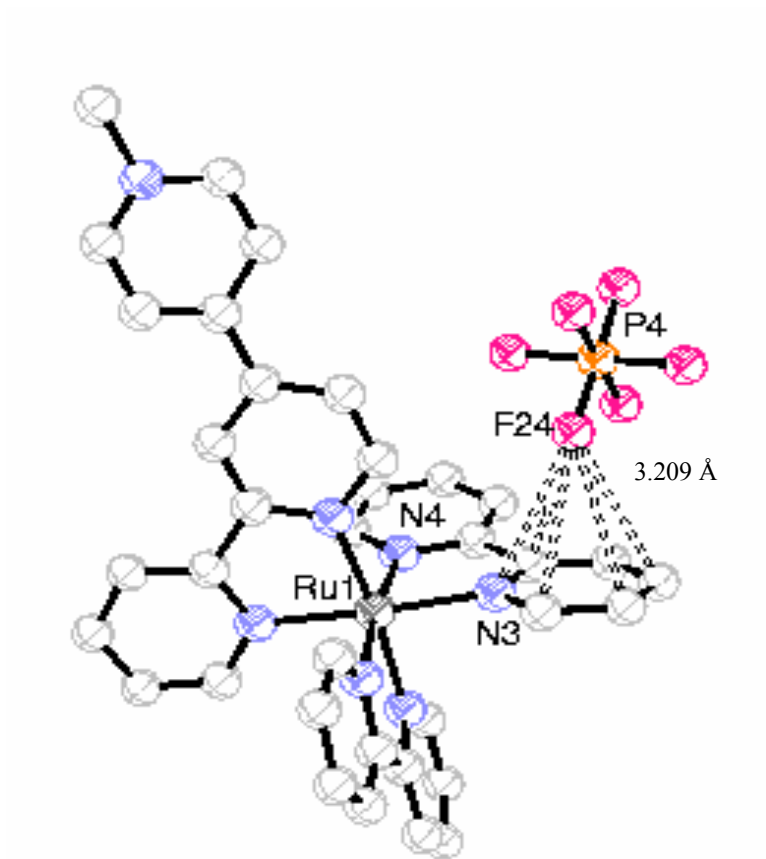

Supplement: b311000a.pdf [file b311000a.pdf]
